# Supplementary material for: Specific increase of Fusobacterium in the faecal microbiota of neonatal calves infected with Cryptosporidium parvum
Source: PubMed Central journal article supplement (PMC6715637; doi:10.1038/s41598-019-48969-6), 2019-08-29

**Specific increase of *Fusobacterium* in the faecal microbiota of neonatal calves infected with *Cryptosporidium parvum***

Madoka Ichikawa-Seki<sup>a</sup>, Daisuke Motooka<sup>b</sup>, Aiko Kinami<sup>c</sup>, Fumi Murakoshi<sup>d,e</sup>, Yoko Takahashi<sup>f</sup>, Junya Aita<sup>a</sup>, Kei Hayashi<sup>a,g</sup>, Atsushi Tashibu<sup>a</sup>, Shota Nakamura<sup>b</sup>, Tetsuya Iida<sup>b</sup>, Toshihiro Horii<sup>b</sup>, Yoshifumi Nishikawa<sup>d\*</sup>

<sup>a</sup>Laboratory of Veterinary Parasitology, Faculty of Agriculture, Iwate University, 3-18-8 Ueda, Morioka 020-8550, Japan; <sup>b</sup>Department of Infection Metagenomics, Genome Information Research Center, Research Institute for Microbial Diseases, Osaka University, Suita 565-0871, Japan; <sup>c</sup>Famille202, 110-16, Ogama-todate, Takizawa, Iwate 020-0762, Japan; <sup>d</sup>National Research Center for Protozoan Diseases, Obihiro University of Agriculture and Veterinary Medicine, Nishi 2-13 Inada-cho, Obihiro 080-8555, Japan; <sup>e</sup>Department of Infectious Diseases, Kyoto Prefectural School of Medicine, 465, Kajicho, Kawaramachi-hirokoji, Kamigyo-ku, Kyoto, 602-8566, Japan; <sup>f</sup>Tyubu Area Center Veterinary Clinic, Iwate Agricultural Mutual Aid Association, 821 Shimoneko, Hanamaki, Iwate 025-0025, Japan; <sup>g</sup>Laboratory of Veterinary Parasitology, Faculty of Veterinary Medicine, Okayama University of Science, 1-3 Ikojooka, Imabari 794-8555, Japan.

\*Address correspondence to Yoshifumi Nishikawa, [nisikawa@obihiro.ac.jp](mailto:nisikawa@obihiro.ac.jp)

**Supplementary material**

**Table S1** Age in days of six time collection for the 20 calves in farm #A.

| Group                                           | Neonatal calf ID | Age in days |      |      |      |      |      |      |      |      |      |      |      |      |      |      |      |
|-------------------------------------------------|------------------|-------------|------|------|------|------|------|------|------|------|------|------|------|------|------|------|------|
|                                                 |                  | 0           | 1    | 2    | 3    | 4    | 5    | 6    | 7    | 8    | 9    | 10   | 11   | 12   | 13   | 14   | 15   |
| <i>C. parvum</i> -only infected ( <i>n</i> = 8) | 1                |             | 1.1  |      |      | 1.2  |      |      | 1.3  |      |      | 1.4  |      |      | 1.5  |      | 1.6  |
|                                                 | 2                |             | 2.1  |      | 2.2  |      |      | 2.3  |      | 2.4  |      |      | 2.5  |      | 2.6  |      |      |
|                                                 | 6                |             | 6.1  |      |      | 6.2  |      | 6.3  |      | 6.4  |      |      | 6.5  |      | 6.6  |      |      |
|                                                 | 8                |             | 8.1  |      | 8.2  |      |      | 8.3  |      | 8.4  |      |      | 8.5  |      | 8.6  |      |      |
|                                                 | 12               |             | 12.1 |      | 12.2 |      |      | 12.3 |      |      | 12.4 |      |      | 12.5 |      |      | 12.6 |
|                                                 | 21               |             | 21.1 |      |      | 21.2 |      |      | 21.3 |      |      | 21.4 |      | 21.5 |      | 21.6 |      |
|                                                 | 22               |             | 22.1 |      | 22.2 |      | 22.3 |      | 22.4 |      |      | 22.5 |      | 22.6 |      |      |      |
|                                                 | 25               |             | 25.1 |      | 25.2 |      |      | 25.3 |      |      |      | 25.4 |      | 25.5 |      | 25.6 |      |
| total sample number                             |                  | 0           | 8    | 0    | 5    | 3    | 1    | 5    | 3    | 3    | 3    | 3    | 4    | 2    | 5    | 1    | 2    |
| rotavirus-only infected ( <i>n</i> = 5)         | 28               |             | 28.1 |      |      |      | 28.2 |      |      | 28.3 |      | 28.4 |      | 28.5 |      |      | 28.6 |
|                                                 | 30               |             | 30.1 |      | 30.2 |      |      | 30.3 |      | 30.4 |      | 30.5 |      | 30.6 |      |      |      |
|                                                 | 31               |             | 31.1 |      | 31.2 |      |      | 31.3 |      | 31.4 |      | 31.5 |      | 31.6 |      |      |      |
|                                                 | 35               |             | 35.1 |      |      | 35.2 |      | 35.3 |      | 35.4 |      |      | 35.5 |      | 35.6 |      |      |
|                                                 | 37               |             | 37.1 |      | 37.2 |      |      | 37.3 |      | 37.4 |      |      | 37.5 |      | 37.6 |      |      |
| total sample number                             |                  | 0           | 5    | 0    | 3    | 1    | 1    | 4    | 0    | 5    | 0    | 4    | 1    | 3    | 2    | 0    | 1    |
| pathogen-negative calves ( <i>n</i> = 7)        | 26               |             | 26.1 |      | 26.2 |      | 26.3 |      |      |      | 26.4 |      |      | 26.5 |      | 26.6 |      |
|                                                 | 29               |             | 29.1 |      |      | 29.2 |      |      | 29.3 |      | 29.4 |      | 29.5 |      | 29.6 |      |      |
|                                                 | 32               |             | 32.1 |      | 32.2 |      | 32.3 |      | 32.4 |      | 32.5 |      | 32.6 |      |      |      |      |
|                                                 | 33               |             | 33.1 |      | 33.2 |      | 33.3 |      | 33.4 |      | 33.5 |      | 33.6 |      |      |      |      |
|                                                 | 34               | 34.1        |      | 34.2 |      | 34.3 |      | 34.4 |      | 34.5 |      | 34.6 |      |      |      |      |      |
|                                                 | 36               |             | 36.1 |      |      | 36.2 |      |      | 36.3 |      | 36.4 |      | 36.5 |      |      | 36.6 |      |
|                                                 | 38               |             | 38.1 |      |      | 38.2 |      | 38.3 |      |      | 38.4 |      | 38.5 |      | 38.6 |      |      |
| total sample number                             |                  | 1           | 6    | 1    | 3    | 4    | 3    | 2    | 4    | 1    | 6    | 1    | 5    | 1    | 2    | 2    | 0    |

The number of each collection was shown after a dot.

**Table S2** Distribution of bacterial relative abundance (%) among the three groups from farm #A.

| genus                                                                                                        | <i>C. parvum</i> (n = 8) | Rotavirus (n = 5) | Negative (n = 7) |
|--------------------------------------------------------------------------------------------------------------|--------------------------|-------------------|------------------|
| 1 Bacteria;_Fusobacteria;_Fusobacteria;_Fusobacteriales;_Fusobacteriaceae;_Fusobacterium                     | 14.1                     | 0.7               | 2.0              |
| 2 Bacteria;_Proteobacteria;_Gammaproteobacteria;_Enterobacteriales;_Enterobacteriaceae;_Escherichia-Shigella | 12.8                     | 11.9              | 17.0             |
| 3 Bacteria;_Bacteroidetes;_Bacteroidia;_Bacteroidales;_Bacteroidaceae;_Bacteroides                           | 10.8                     | 9.3               | 15.3             |
| 4 Bacteria;_Bacteroidetes;_Bacteroidia;_Bacteroidales;_Prevotellaceae;_Prevotella                            | 8.1                      | 12.1              | 9.2              |
| 5 Bacteria;_Firmicutes;_Bacilli;_Lactobacillales;_Lactobacillaceae;_Lactobacillus                            | 7.9                      | 10.3              | 9.2              |
| 6 Bacteria;_Bacteroidetes;_Bacteroidia;_Bacteroidales;_ratAN060301C;_g                                       | 5.6                      | 7.7               | 9.2              |
| 7 Bacteria;_Firmicutes;_Clostridia;_Clostridiales;_Ruminococcaceae;_Faecalibacterium                         | 4.5                      | 6.8               | 7.3              |
| 8 Bacteria;_Bacteroidetes;_Bacteroidia;_Bacteroidales;_Prevotellaceae;Other                                  | 3.8                      | 2.1               | 1.0              |
| 9 Bacteria;_Firmicutes;_Clostridia;_Clostridiales;_Lachnospiraceae;Other                                     | 3.7                      | 4.1               | 4.3              |
| 10 Bacteria;_Firmicutes;_Clostridia;_Clostridiales;_Ruminococcaceae;_Incertae_Sedis                          | 3.4                      | 1.7               | 2.6              |
| 11 Bacteria;Other;Other;Other;Other;Other                                                                    | 3.2                      | 1.6               | 1.0              |
| 12 Bacteria;_Firmicutes;_Clostridia;_Clostridiales;_Clostridiaceae;_Clostridium                              | 2.8                      | 0.7               | 2.5              |
| 13 Bacteria;_Proteobacteria;_Betaproteobacteria;_Burkholderiales;_Alcaligenaceae;_Sutterella                 | 2.4                      | 1.8               | 2.6              |
| 14 Bacteria;_Proteobacteria;_Gammaproteobacteria;_Enterobacteriales;_Enterobacteriaceae;Other                | 2.1                      | 5.5               | 2.2              |
| 15 Bacteria;_Proteobacteria;_Gammaproteobacteria;_Pasteurellales;_Pasteurellaceae;_Gallibacterium            | 2.0                      | 1.6               | 1.3              |
| 16 Bacteria;_Firmicutes;_Bacilli;_Lactobacillales;_Enterococcaceae;_Enterococcus                             | 1.3                      | 0.8               | 1.6              |
| 17 Bacteria;_Actinobacteria;_Coriobacterii;_Coriobacteriales;_Coriobacteriaceae;_Collinsella                 | 1.2                      | 1.1               | 0.9              |
| 18 Bacteria;_Proteobacteria;_Gammaproteobacteria;_Pasteurellales;_Pasteurellaceae;Other                      | 1.1                      | 1.1               | 0.9              |
| 19 Bacteria;_Firmicutes;_Clostridia;_Clostridiales;_Lachnospiraceae;_Blautia                                 | 1.0                      | 2.8               | 1.6              |
| 20 Bacteria;_Bacteroidetes;_Bacteroidia;_Bacteroidales;Other;Other                                           | 0.9                      | 0.6               | 0.4              |
| 21 Bacteria;_Bacteroidetes;_Bacteroidia;_Bacteroidales;_Porphyromonadaceae;_Parabacteroides                  | 0.7                      | 0.8               | 0.4              |
| 22 Bacteria;_Firmicutes;_Bacilli;_Lactobacillales;Other;Other                                                | 0.6                      | 0.6               | 0.3              |
| 23 Bacteria;_Proteobacteria;_Epsilonproteobacteria;_Campylobacteriales;_Campylobacteraceae;_Campylobacter    | 0.5                      | 0.1               | 0.0              |
| 24 Bacteria;_Proteobacteria;_Gammaproteobacteria;_Enterobacteriales;_Enterobacteriaceae;_Proteus             | 0.5                      | 0.0               | 0.0              |
| 25 Bacteria;_Actinobacteria;_Actinobacteria;_Bifidobacteriales;_Bifidobacteriaceae;Other                     | 0.5                      | 2.7               | 0.9              |
| 26 Bacteria;_Firmicutes;_Clostridia;_Clostridiales;_Lachnospiraceae;_Incertae_Sedis                          | 0.4                      | 0.9               | 0.4              |
| 27 Bacteria;_Proteobacteria;_Gammaproteobacteria;_Aeromonadales;_Succinivibrionaceae;_Succinivibrio          | 0.4                      | 2.1               | 1.2              |
| 28 Bacteria;_Firmicutes;_Clostridia;_Clostridiales;_Lachnospiraceae;_Dorea                                   | 0.3                      | 1.4               | 0.7              |
| 29 Bacteria;_Firmicutes;_Clostridia;_Clostridiales;_Peptostreptococcaceae;_Incertae_Sedis                    | 0.3                      | 0.6               | 0.5              |
| 30 Bacteria;_Firmicutes;_Bacilli;_Lactobacillales;_Streptococcaceae;_Streptococcus                           | 0.3                      | 0.4               | 0.3              |
| 31 Bacteria;_Firmicutes;Other;Other;Other;Other                                                              | 0.2                      | 0.2               | 0.2              |
| 32 Bacteria;_Firmicutes;_Clostridia;_Clostridiales;_Veillonellaceae;_Allisonella                             | 0.2                      | 0.2               | 0.2              |
| 33 Bacteria;_Firmicutes;_Clostridia;_Clostridiales;_Veillonellaceae;_Anaerovibrio                            | 0.2                      | 0.1               | 0.0              |
| 34 Bacteria;_Actinobacteria;_Actinobacteria;_Bifidobacteriales;_Bifidobacteriaceae;_Gardnerella              | 0.2                      | 0.3               | 0.4              |
| 35 Bacteria;_Firmicutes;_Clostridia;_Clostridiales;_Ruminococcaceae;_Subdoligranulum                         | 0.2                      | 0.6               | 0.1              |
| 36 Bacteria;_Bacteroidetes;_Bacteroidia;_Bacteroidales;_Rikenellaceae;_RC9_gut_group                         | 0.1                      | 0.2               | 0.1              |
| 37 Bacteria;_Firmicutes;_Clostridia;_Clostridiales;_Veillonellaceae;Other                                    | 0.1                      | 0.2               | 0.0              |
| 38 Bacteria;_Proteobacteria;_Betaproteobacteria;_Burkholderiales;_Alcaligenaceae;Other                       | 0.1                      | 0.0               | 0.0              |
| 39 Bacteria;_Firmicutes;_Clostridia;_Clostridiales;_Peptostreptococcaceae;_Peptostreptococcus                | 0.1                      | 0.0               | 0.0              |
| 40 Bacteria;_Firmicutes;_Clostridia;_Clostridiales;_Veillonellaceae;_Megamonas                               | 0.1                      | 0.0               | 0.0              |
| 41 Bacteria;_Actinobacteria;_Actinobacteria;_Bifidobacteriales;_Bifidobacteriaceae;_Bifidobacterium          | 0.1                      | 0.0               | 0.0              |
| 42 Bacteria;_Proteobacteria;_Deltaproteobacteria;_Desulfovibrionales;_Desulfovibrionaceae;_Desulfovibrio     | 0.1                      | 0.0               | 0.0              |
| 43 Bacteria;_Firmicutes;_Clostridia;_Clostridiales;_Lachnospiraceae;_Moryella                                | 0.1                      | 0.0               | 0.1              |
| 44 Bacteria;_Firmicutes;_Clostridia;_Clostridiales;_Ruminococcaceae;Other                                    | 0.1                      | 0.1               | 0.1              |
| 45 Bacteria;_Firmicutes;_Clostridia;_Clostridiales;_Lachnospiraceae;_Marvinbryantia                          | 0.1                      | 0.1               | 0.2              |
| 46 Bacteria;_Proteobacteria;_Gammaproteobacteria;_Aeromonadales;_Aeromonadaceae;_Aeromonas                   | 0.1                      | 0.0               | 0.0              |
| 47 Bacteria;_Bacteroidetes;_Bacteroidia;_Bacteroidales;_Prevotellaceae;_g                                    | 0.1                      | 0.0               | 0.0              |
| 48 Bacteria;_Bacteroidetes;_Bacteroidia;_Bacteroidales;_Porphyromonadaceae;_Odoribacter                      | 0.1                      | 0.0               | 0.0              |
| 49 Bacteria;_Proteobacteria;_Gammaproteobacteria;_Pasteurellales;_Pasteurellaceae;_Mannheimia                | 0.0                      | 0.0               | 0.0              |
| 50 Bacteria;_Proteobacteria;_Gammaproteobacteria;_Pasteurellales;_Pasteurellaceae;_Pasteurella               | 0.0                      | 0.0               | 0.0              |
| 51 Bacteria;_Bacteroidetes;_Bacteroidia;_Bacteroidales;_S24-7;_g                                             | 0.0                      | 0.1               | 0.0              |
| 52 Bacteria;_Firmicutes;_Erysipelotrichi;_Erysipelotrichales;_Erysipelotrichaceae;_Turicibacter              | 0.0                      | 0.0               | 0.0              |
| 53 Bacteria;_Actinobacteria;_Coriobacterii;_Coriobacteriales;_Coriobacteriaceae;_Atopobium                   | 0.0                      | 0.1               | 0.0              |
| 54 Bacteria;_Firmicutes;_Clostridia;_Clostridiales;_Veillonellaceae;_Veillonella                             | 0.0                      | 0.0               | 0.0              |
| 55 Bacteria;_Proteobacteria;_Betaproteobacteria;_Burkholderiales;_Alcaligenaceae;_Parasutterella             | 0.0                      | 0.1               | 0.0              |
| 56 Bacteria;_Firmicutes;_Clostridia;_Clostridiales;_Clostridiaceae;Other                                     | 0.0                      | 0.0               | 0.0              |
| 57 Bacteria;_Firmicutes;_Clostridia;_Clostridiales;_Lachnospiraceae;_Howardella                              | 0.0                      | 0.0               | 0.0              |
| 58 Bacteria;_Bacteroidetes;_Bacteroidia;_Bacteroidales;_Rikenellaceae;_Alistipes                             | 0.0                      | 0.0               | 0.0              |
| 59 Bacteria;_Proteobacteria;_Gammaproteobacteria;_Enterobacteriales;_Enterobacteriaceae;_Klebsiella          | 0.0                      | 0.0               | 0.1              |
| 60 Bacteria;_Bacteroidetes;_Bacteroidia;_Bacteroidales;_Porphyromonadaceae;_Butyricimonas                    | 0.0                      | 0.0               | 0.0              |
| 61 Bacteria;_Fusobacteria;_Fusobacteria;_Fusobacteriales;_Fusobacteriaceae;Other                             | 0.0                      | 0.0               | 0.0              |
| 62 Bacteria;_Firmicutes;_Clostridia;_Clostridiales;_Family_XIII_Incertae_Sedis;_Mogibacterium                | 0.0                      | 0.0               | 0.0              |
| 63 Bacteria;_Firmicutes;_Clostridia;_Clostridiales;_Veillonellaceae;_Mitsuokella                             | 0.0                      | 0.0               | 0.0              |
| 64 Bacteria;_Firmicutes;_Clostridia;_Clostridiales;_Ruminococcaceae;_Anaerotruncus                           | 0.0                      | 0.0               | 0.0              |
| 65 Bacteria;_Actinobacteria;_Actinobacteria;_Corynebacteriales;Other;Other                                   | 0.0                      | 0.0               | 0.0              |
| 66 Bacteria;_Firmicutes;_Clostridia;_Clostridiales;_Peptostreptococcaceae;Other                              | 0.0                      | 0.0               | 0.0              |
| 67 Bacteria;_Firmicutes;_Clostridia;_Clostridiales;_Clostridiaceae;_Sarcina                                  | 0.0                      | 0.2               | 0.1              |
| 68 Bacteria;_Firmicutes;_Clostridia;_Clostridiales;_Veillonellaceae;_Phascolarctobacterium                   | 0.0                      | 0.1               | 0.0              |
| 69 Bacteria;_Firmicutes;_Bacilli;Other;Other;Other                                                           | 0.0                      | 0.0               | 0.0              |
| 70 Bacteria;_Firmicutes;_Clostridia;_Clostridiales;_Lachnospiraceae;_Syntrophococcus                         | 0.0                      | 0.0               | 0.0              |
| 71 Bacteria;_Actinobacteria;_Actinobacteria;_Actinomycetales;_Actinomycetaceae;_Actinomyces                  | 0.0                      | 0.0               | 0.0              |
| 72 Bacteria;_Fusobacteria;_Fusobacteria;_Fusobacteriales;Other;Other                                         | 0.0                      | 0.0               | 0.0              |
| 73 Bacteria;_Proteobacteria;_Gammaproteobacteria;_Aeromonadales;_Succinivibrionaceae;Other                   | 0.0                      | 0.0               | 0.0              |
| 74 Bacteria;_Firmicutes;_Bacilli;_Lactobacillales;_Lactobacillaceae;Other                                    | 0.0                      | 0.0               | 0.0              |
| 75 Bacteria;_Proteobacteria;_Betaproteobacteria;_Burkholderiales;_Comamonadaceae;Other                       | 0.0                      | 0.2               | 0.1              |
| 76 Bacteria;_Bacteroidetes;_Bacteroidia;_Bacteroidales;_Porphyromonadaceae;Other                             | 0.0                      | 0.0               | 0.0              |
| 77 Bacteria;_Actinobacteria;_Coriobacterii;_Coriobacteriales;_Coriobacteriaceae;Other                        | 0.0                      | 0.0               | 0.0              |
| 78 Bacteria;_Firmicutes;_Clostridia;_Clostridiales;Other;Other                                               | 0.0                      | 0.0               | 0.0              |
| 79 Bacteria;_Proteobacteria;_Betaproteobacteria;_Burkholderiales;Other;Other                                 | 0.0                      | 0.0               | 0.0              |
| 80 Bacteria;_Proteobacteria;_Gammaproteobacteria;Other;Other;Other                                           | 0.0                      | 0.0               | 0.0              |
| 81 Bacteria;_Firmicutes;_Clostridia;_Clostridiales;_Lachnospiraceae;_Pseudobutyrvibrio                       | 0.0                      | 0.0               | 0.0              |
| 82 Bacteria;_Firmicutes;_Clostridia;_Clostridiales;_Ruminococcaceae;_g                                       | 0.0                      | 0.1               | 0.0              |
| 83 Bacteria;_Firmicutes;_Clostridia;_Clostridiales;_Family_XIII_Incertae_Sedis;_Incertae_Sedis               | 0.0                      | 0.0               | 0.0              |
| 84 Bacteria;_Firmicutes;_Clostridia;_Clostridiales;_Lachnospiraceae;_Butyrvibrio                             | 0.0                      | 0.0               | 0.0              |
| 85 Bacteria;_Actinobacteria;_Actinobacteria;_Corynebacteriales;_Corynebacteriaceae;_Corynebacterium          | 0.0                      | 0.0               | 0.0              |
| 86 Bacteria;_Firmicutes;_Clostridia;_Clostridiales;_Ruminococcaceae;_Papillibacter                           | 0.0                      | 0.0               | 0.0              |
| 87 Bacteria;_Firmicutes;_Erysipelotrichi;_Erysipelotrichales;_Erysipelotrichaceae;_Incertae_Sedis            | 0.0                      | 0.0               | 0.0              |

|     |                                                                                                        |     |     |     |
|-----|--------------------------------------------------------------------------------------------------------|-----|-----|-----|
| 88  | Bacteria;_Proteobacteria;_Gammaproteobacteria;_Aeromonadales;_Succinivibrionaceae;_g                   | 0.0 | 0.0 | 0.0 |
| 89  | Bacteria;_Firmicutes;_Clostridia;_Clostridiales;_Veillonellaceae;_Acidaminococcus                      | 0.0 | 0.0 | 0.0 |
| 90  | Bacteria;_Bacteroidetes;_Bacteroidia;_Bacteroidales;_p-2534-18B5_gut_group;_g                          | 0.0 | 0.0 | 0.0 |
| 91  | Bacteria;_Bacteroidetes;_Bacteroidia;_Bacteroidales;_Rikenellaceae;Other                               | 0.0 | 0.0 | 0.0 |
| 92  | Bacteria;_Firmicutes;_Clostridia;_Clostridiales;_Family_XI_Incertae_Sedis;_Parvimonas                  | 0.0 | 0.0 | 0.0 |
| 93  | Bacteria;_Firmicutes;_Clostridia;_Clostridiales;_Peptococcaceae;_Peptococcus                           | 0.0 | 0.0 | 0.0 |
| 94  | Bacteria;_Firmicutes;_Clostridia;_Clostridiales;_Family_XI_Incertae_Sedis;_Anaerococcus                | 0.0 | 0.0 | 0.0 |
| 95  | Bacteria;_Proteobacteria;_Gammaproteobacteria;_Pseudomonadales;_Moraxellaceae;_Acinetobacter           | 0.0 | 0.1 | 0.0 |
| 96  | Bacteria;_Firmicutes;_Clostridia;_Clostridiales;_Eubacteriaceae;_Eubacterium                           | 0.0 | 0.0 | 0.0 |
| 97  | Bacteria;_Proteobacteria;_Deltaproteobacteria;_Desulfovibrionales;_Desulfovibrionaceae;_Bilophila      | 0.0 | 0.0 | 0.0 |
| 98  | Bacteria;_Proteobacteria;_Gammaproteobacteria;_Pseudomonadales;_Pseudomonadaceae;Other                 | 0.0 | 0.0 | 0.0 |
| 99  | Bacteria;_Firmicutes;_Clostridia;_Clostridiales;_Veillonellaceae;_Dialister                            | 0.0 | 0.0 | 0.0 |
| 100 | Bacteria;_Actinobacteria;_Actinobacteria;_Actinomycetales;_Actinomycetaceae;_Trueperella               | 0.0 | 0.0 | 0.0 |
| 101 | Bacteria;_Firmicutes;_Clostridia;_Clostridiales;_Family_XIII_Incertae_Sedis;Other                      | 0.0 | 0.0 | 0.0 |
| 102 | Bacteria;_Lentisphaerae;_Lentisphaeria;_Victivallales;_Victivallaceae;_Victivallis                     | 0.0 | 0.0 | 0.0 |
| 103 | Bacteria;_Proteobacteria;_Deltaproteobacteria;_Desulfovibrionales;_Desulfovibrionaceae;Other           | 0.0 | 0.0 | 0.0 |
| 104 | Bacteria;_Fusobacteria;_Fusobacteria;_Fusobacteriales;_CFT112H7;_g                                     | 0.0 | 0.0 | 0.0 |
| 105 | Bacteria;_Actinobacteria;_Coriobacterii;_Coriobacteriales;_Coriobacteriaceae;_Eggerthella              | 0.0 | 0.0 | 0.0 |
| 106 | Bacteria;_Bacteroidetes;_Bacteroidia;_Bacteroidales;_Porphyromonadaceae;_Porphyromonas                 | 0.0 | 0.0 | 0.0 |
| 107 | Bacteria;_Firmicutes;_Bacilli;_Bacillales;_Planococcaceae;_Lysinibacillus                              | 0.0 | 0.0 | 0.1 |
| 108 | Bacteria;_Proteobacteria;_Gammaproteobacteria;_Pseudomonadales;_Moraxellaceae;_Psychrobacter           | 0.0 | 0.0 | 0.0 |
| 109 | Bacteria;_Proteobacteria;Other;Other;Other;Other                                                       | 0.0 | 0.0 | 0.0 |
| 110 | Bacteria;_Bacteroidetes;Other;Other;Other;Other                                                        | 0.0 | 0.0 | 0.0 |
| 111 | Bacteria;_Firmicutes;_Bacilli;_Lactobacillales;_Streptococcaceae;_Lactococcus                          | 0.0 | 0.0 | 0.0 |
| 112 | Bacteria;_Firmicutes;_Clostridia;_Clostridiales;_Family_XI_Incertae_Sedis;_Helcococcus                 | 0.0 | 0.0 | 0.0 |
| 113 | Bacteria;_Firmicutes;_Clostridia;_Clostridiales;_Veillonellaceae;_Megasphaera                          | 0.0 | 0.1 | 0.0 |
| 114 | Bacteria;_Fusobacteria;_Fusobacteria;_Fusobacteriales;_boneC3G7;_g                                     | 0.0 | 0.0 | 0.0 |
| 115 | Bacteria;_Proteobacteria;_Alphaproteobacteria;Other;Other;Other                                        | 0.0 | 0.0 | 0.0 |
| 116 | Bacteria;_Actinobacteria;_Actinobacteria;_Actinomycetales;_Actinomycetaceae;Other                      | 0.0 | 0.0 | 0.0 |
| 117 | Bacteria;_Proteobacteria;_Epsilonproteobacteria;_Campylobacterales;_Helicobacteraceae;_Helicobacter    | 0.0 | 0.0 | 0.0 |
| 118 | Bacteria;_Firmicutes;_Clostridia;_Clostridiales;_Veillonellaceae;_Negativicoccus                       | 0.0 | 0.0 | 0.0 |
| 119 | Bacteria;_Firmicutes;_Erysipelotrichi;_Erysipelotrichales;_Erysipelotrichaceae;Other                   | 0.0 | 0.0 | 0.0 |
| 120 | Bacteria;_Proteobacteria;_Betaproteobacteria;Other;Other;Other                                         | 0.0 | 0.0 | 0.0 |
| 121 | Bacteria;_Actinobacteria;_Actinobacteria;_Micrococcales;_Micrococcaceae;_Nesterenkonia                 | 0.0 | 0.0 | 0.0 |
| 122 | Bacteria;_Bacteroidetes;_Bacteroidia;_Bacteroidales;_Porphyromonadaceae;_Barnesiella                   | 0.0 | 0.0 | 0.0 |
| 123 | Bacteria;_Bacteroidetes;_Flavobacteria;_Flavobacteriales;_Flavobacteriaceae;Other                      | 0.0 | 0.0 | 0.0 |
| 124 | Bacteria;_Firmicutes;_Clostridia;_Clostridiales;_Family_XI_Incertae_Sedis;_Finegoldia                  | 0.0 | 0.0 | 0.0 |
| 125 | Bacteria;_Actinobacteria;_Actinobacteria;_Corynebacteriales;_Dietziaceae;_Dietzia                      | 0.0 | 0.0 | 0.0 |
| 126 | Bacteria;_Bacteroidetes;_Flavobacteria;_Flavobacteriales;_Flavobacteriaceae;_Weeksella                 | 0.0 | 0.0 | 0.0 |
| 127 | Bacteria;_Proteobacteria;_Gammaproteobacteria;_Vibrionales;_Vibrionaceae;Other                         | 0.0 | 0.0 | 0.0 |
| 128 | Bacteria;_Firmicutes;_Erysipelotrichi;_Erysipelotrichales;_Erysipelotrichaceae;_Sharpea                | 0.0 | 0.0 | 0.0 |
| 129 | Bacteria;_Actinobacteria;_Actinobacteria;Other;Other;Other                                             | 0.0 | 0.0 | 0.0 |
| 130 | Bacteria;_Actinobacteria;_Actinobacteria;_Corynebacteriales;_Nocardiaceae;_Rhodococcus                 | 0.0 | 0.0 | 0.0 |
| 131 | Bacteria;_Bacteroidetes;_Flavobacteria;_Flavobacteriales;Other;Other                                   | 0.0 | 0.0 | 0.0 |
| 132 | Bacteria;_Proteobacteria;_Alphaproteobacteria;_Rhodospirillales;_Rhodospirillaceae;_Thalassospira      | 0.0 | 0.0 | 0.0 |
| 133 | Bacteria;_Proteobacteria;_Gammaproteobacteria;_Pseudomonadales;_Pseudomonadaceae;_Pseudomonas          | 0.0 | 0.0 | 0.0 |
| 134 | Bacteria;_Proteobacteria;_Betaproteobacteria;_Burkholderiales;_Alcaligenaceae;_Oligella                | 0.0 | 0.1 | 0.0 |
| 135 | Bacteria;_Actinobacteria;Other;Other;Other;Other                                                       | 0.0 | 0.0 | 0.0 |
| 136 | Bacteria;_Actinobacteria;_Actinobacteria;_Propionibacteriales;_Propionibacteriaceae;_Propionibacterium | 0.0 | 0.1 | 0.1 |
| 137 | Bacteria;_Bacteroidetes;_Bacteroidia;_Bacteroidales;_Porphyromonadaceae;_Dysgonomonas                  | 0.0 | 0.0 | 0.0 |
| 138 | Bacteria;_Firmicutes;_Clostridia;_Clostridiales;_Eubacteriaceae;_Pseudoramibacter                      | 0.0 | 0.0 | 0.0 |
| 139 | Bacteria;_Firmicutes;_Clostridia;_Clostridiales;_Family_XI_Incertae_Sedis;_Peptoniphilus               | 0.0 | 0.0 | 0.0 |
| 140 | Bacteria;_Firmicutes;_Clostridia;_Clostridiales;_Ruminococcaceae;_Anaerofilum                          | 0.0 | 0.0 | 0.0 |
| 141 | Bacteria;_Firmicutes;_Clostridia;_Clostridiales;_Ruminococcaceae;_Flavonifractor                       | 0.0 | 0.0 | 0.0 |
| 142 | Bacteria;_Proteobacteria;_Alphaproteobacteria;_Caulobacterales;_Caulobacteraceae;_Brevundimonas        | 0.0 | 0.0 | 0.0 |
| 143 | Bacteria;_Proteobacteria;_Alphaproteobacteria;_Rhizobiales;_Brucellaceae;_Ochrobactrum                 | 0.0 | 0.0 | 0.0 |
| 144 | Bacteria;_Proteobacteria;_Alphaproteobacteria;_Sphingomonadales;_Sphingomonadaceae;Other               | 0.0 | 0.4 | 0.2 |
| 145 | Bacteria;_Proteobacteria;_Betaproteobacteria;_Burkholderiales;_Oxalobacteraceae;_Undibacterium         | 0.0 | 0.0 | 0.0 |
| 146 | Bacteria;_Proteobacteria;_Betaproteobacteria;_Neisseriales;_Neisseriaceae;Other                        | 0.0 | 0.0 | 0.0 |
| 147 | Bacteria;_Proteobacteria;_Gammaproteobacteria;_Pseudomonadales;_Moraxellaceae;_Alkanindiges            | 0.0 | 0.0 | 0.0 |
| 148 | Bacteria;_Proteobacteria;_Gammaproteobacteria;_Xanthomonadales;_Xanthomonadaceae;_Stenotrophomonas     | 0.0 | 0.1 | 0.0 |
| 149 | Bacteria;_Actinobacteria;_Actinobacteria;_Actinomycetales;_Actinomycetaceae;_Mobiluncus                | 0.0 | 0.0 | 0.0 |
| 150 | Bacteria;_Actinobacteria;_Actinobacteria;_Bifidobacteriales;_Bifidobacteriaceae;_Alloscardovia         | 0.0 | 0.0 | 0.0 |
| 151 | Bacteria;_Actinobacteria;_Actinobacteria;_Micrococcales;Other;Other                                    | 0.0 | 0.0 | 0.0 |
| 152 | Bacteria;_Actinobacteria;_Actinobacteria;_Micrococcales;_Microbacteriaceae;_Amnibacterium              | 0.0 | 0.0 | 0.0 |
| 153 | Bacteria;_Actinobacteria;_Actinobacteria;_Micrococcales;_Microbacteriaceae;_Curtobacterium             | 0.0 | 0.0 | 0.0 |
| 154 | Bacteria;_Actinobacteria;_Actinobacteria;_Micrococcales;_Microbacteriaceae;_Microbacterium             | 0.0 | 0.0 | 0.0 |
| 155 | Bacteria;_Actinobacteria;_Actinobacteria;_Micrococcales;_Micrococcaceae;Other                          | 0.0 | 0.0 | 0.0 |
| 156 | Bacteria;_Actinobacteria;_Actinobacteria;_Micrococcales;_Micrococcaceae;_Micrococcus                   | 0.0 | 0.0 | 0.0 |
| 157 | Bacteria;_Actinobacteria;_Actinobacteria;_Micrococcales;_Micrococcaceae;_Rothia                        | 0.0 | 0.0 | 0.0 |
| 158 | Bacteria;_Actinobacteria;_Actinobacteria;_Streptomycetales;_Streptomycetaceae;_Streptomyces            | 0.0 | 0.0 | 0.0 |
| 159 | Bacteria;_Actinobacteria;_Coriobacterii;_Coriobacteriales;_Coriobacteriaceae;_g                        | 0.0 | 0.0 | 0.0 |
| 160 | Bacteria;_Bacteroidetes;_Flavobacteria;_Flavobacteriales;_Flavobacteriaceae;_Bergeyella                | 0.0 | 0.0 | 0.0 |
| 161 | Bacteria;_Bacteroidetes;_Flavobacteria;_Flavobacteriales;_Flavobacteriaceae;_Capnocytophaga            | 0.0 | 0.0 | 0.0 |
| 162 | Bacteria;_Bacteroidetes;_Flavobacteria;_Flavobacteriales;_Flavobacteriaceae;_Myroides                  | 0.0 | 0.0 | 0.0 |
| 163 | Bacteria;_Bacteroidetes;_Sphingobacterii;_Sphingobacteriales;_Chitinophagaceae;_g                      | 0.0 | 0.0 | 0.0 |
| 164 | Bacteria;_Bacteroidetes;_Sphingobacterii;_Sphingobacteriales;_Sphingobacteriaceae;_Olivibacter         | 0.0 | 0.0 | 0.0 |
| 165 | Bacteria;_Bacteroidetes;_Sphingobacterii;_Sphingobacteriales;_Sphingobacteriaceae;_Sphingobacterium    | 0.0 | 0.0 | 0.0 |
| 166 | Bacteria;_Firmicutes;_Bacilli;_Bacillales;_Planococcaceae;Other                                        | 0.0 | 0.0 | 0.0 |
| 167 | Bacteria;_Firmicutes;_Bacilli;_Bacillales;_Planococcaceae;_Sporosarcina                                | 0.0 | 0.0 | 0.0 |
| 168 | Bacteria;_Firmicutes;_Bacilli;_Bacillales;_Staphylococcaceae;_Jeotgaliococcus                          | 0.0 | 0.0 | 0.0 |
| 169 | Bacteria;_Firmicutes;_Bacilli;_Lactobacillales;_Aerococcaceae;_Eremococcus                             | 0.0 | 0.0 | 0.0 |
| 170 | Bacteria;_Firmicutes;_Bacilli;_Lactobacillales;_Carnobacteriaceae;_Atopostipes                         | 0.0 | 0.0 | 0.0 |
| 171 | Bacteria;_Firmicutes;_Bacilli;_Lactobacillales;_MOB164;_g                                              | 0.0 | 0.0 | 0.0 |
| 172 | Bacteria;_Firmicutes;_Clostridia;_Clostridiales;_Christensenellaceae;_g                                | 0.0 | 0.0 | 0.0 |
| 173 | Bacteria;_Firmicutes;_Clostridia;_Clostridiales;_Family_XI_Incertae_Sedis;Other                        | 0.0 | 0.0 | 0.0 |
| 174 | Bacteria;_Firmicutes;_Clostridia;_Clostridiales;_Lachnospiraceae;_Anaerostipes                         | 0.0 | 0.0 | 0.1 |
| 175 | Bacteria;_Firmicutes;_Clostridia;_Clostridiales;_Lachnospiraceae;_Cellulosilyticum                     | 0.0 | 0.0 | 0.0 |
| 176 | Bacteria;_Firmicutes;_Clostridia;_Clostridiales;_Lachnospiraceae;_Lachnospira                          | 0.0 | 0.0 | 0.0 |

|     |                                                                                                    |     |     |     |
|-----|----------------------------------------------------------------------------------------------------|-----|-----|-----|
| 177 | Bacteria;_Firmicutes;_Clostridia;_Clostridiales;_Ruminococcaceae;_Fastidiosipila                   | 0.0 | 0.0 | 0.0 |
| 178 | Bacteria;_Fusobacteria;_Fusobacteria;_Fusobacteriales;_Fusobacteriaceae;_Cetobacterium             | 0.0 | 0.0 | 0.0 |
| 179 | Bacteria;_Proteobacteria;_Alphaproteobacteria;_Caulobacterales;_Caulobacteraceae;_Asticcacaulis    | 0.0 | 0.0 | 0.0 |
| 180 | Bacteria;_Proteobacteria;_Alphaproteobacteria;_Rhizobiales;Other;Other                             | 0.0 | 0.0 | 0.0 |
| 181 | Bacteria;_Proteobacteria;_Alphaproteobacteria;_Rhizobiales;_Phyllobacteriaceae;Other               | 0.0 | 0.1 | 0.0 |
| 182 | Bacteria;_Proteobacteria;_Alphaproteobacteria;_Rhizobiales;_Rhizobiaceae;_Rhizobium                | 0.0 | 0.3 | 0.1 |
| 183 | Bacteria;_Proteobacteria;_Alphaproteobacteria;_Rickettsiales;_mitochondria;_g                      | 0.0 | 0.0 | 0.0 |
| 184 | Bacteria;_Proteobacteria;_Alphaproteobacteria;_Sphingomonadales;_Sphingomonadaceae;_Novospingobium | 0.0 | 0.0 | 0.0 |
| 185 | Bacteria;_Proteobacteria;_Alphaproteobacteria;_Sphingomonadales;_Sphingomonadaceae;_Sphingomonas   | 0.0 | 0.1 | 0.1 |
| 186 | Bacteria;_Proteobacteria;_Betaproteobacteria;_Burkholderiales;_Burkholderiaceae;_Ralstonia         | 0.0 | 0.0 | 0.0 |
| 187 | Bacteria;_Proteobacteria;_Epsilonproteobacteria;_Campylobacterales;_Campylobacteraceae;Other       | 0.0 | 0.0 | 0.0 |
| 188 | Bacteria;_Synergistetes;_Synergistia;_Synergistales;_Synergistaceae;_Pyramidobacter                | 0.0 | 0.0 | 0.0 |
| 189 | Eukaryota;Other;Other;Other;Other;Other                                                            | 0.0 | 0.0 | 0.0 |
| 190 | Bacteria;_Actinobacteria;_Actinobacteria;_Corynebacteriales;_Mycobacteriaceae;_Mycobacterium       | 0.0 | 0.0 | 0.0 |
| 191 | Bacteria;_Actinobacteria;_Actinobacteria;_Micrococcales;_Brevibacteriaceae;_Brevibacterium         | 0.0 | 0.0 | 0.0 |
| 192 | Bacteria;_Actinobacteria;_Actinobacteria;_Micrococcales;_Dermacoccaceae;_Dermacoccus               | 0.0 | 0.0 | 0.0 |
| 193 | Bacteria;_Actinobacteria;_Actinobacteria;_Micrococcales;_Intrasporangiaceae;Other                  | 0.0 | 0.0 | 0.0 |
| 194 | Bacteria;_Actinobacteria;_Actinobacteria;_Micrococcales;_Microbacteriaceae;_Leucobacter            | 0.0 | 0.0 | 0.0 |
| 195 | Bacteria;_Actinobacteria;_Actinobacteria;_Micromonosporales;_Micromonosporaceae;Other              | 0.0 | 0.0 | 0.0 |
| 196 | Bacteria;_Actinobacteria;_Actinobacteria;_Pseudonocardiales;_Pseudonocardaceae;Other               | 0.0 | 0.0 | 0.0 |
| 197 | Bacteria;_Actinobacteria;_Actinobacteria;_Pseudonocardiales;_Pseudonocardaceae;_Saccharopolyspora  | 0.0 | 0.0 | 0.0 |
| 198 | Bacteria;_Actinobacteria;_Actinobacteria;_Streptosporangiales;_Nocardiopsaceae;_Nocardiopsis       | 0.0 | 0.0 | 0.0 |
| 199 | Bacteria;_Actinobacteria;_Coriobacteriia;_Coriobacteriales;_Coriobacteriaceae;_Paraeggerthella     | 0.0 | 0.0 | 0.0 |
| 200 | Bacteria;_Actinobacteria;_Coriobacteriia;_Coriobacteriales;_Coriobacteriaceae;_Slackia             | 0.0 | 0.0 | 0.0 |
| 201 | Bacteria;_Bacteroidetes;_Bacteroidia;_Bacteroidales;_Prevotellaceae;_Paraprevotella                | 0.0 | 0.0 | 0.0 |
| 202 | Bacteria;_Bacteroidetes;_Bacteroidia;_Bacteroidales;_Prevotellaceae;_Xylanibacter                  | 0.0 | 0.0 | 0.0 |
| 203 | Bacteria;_Bacteroidetes;_Bacteroidia;_Bacteroidales;_RF16;_g                                       | 0.0 | 0.0 | 0.0 |
| 204 | Bacteria;_Bacteroidetes;_Bacteroidia;_Bacteroidales;_uncultured;_g                                 | 0.0 | 0.0 | 0.0 |
| 205 | Bacteria;_Bacteroidetes;_Cytophagia;_Cytophagales;_Cytophagaceae;_Dyadobacter                      | 0.0 | 0.0 | 0.0 |
| 206 | Bacteria;_Bacteroidetes;_Cytophagia;_Cytophagales;_Cytophagaceae;_Hymenobacter                     | 0.0 | 0.0 | 0.0 |
| 207 | Bacteria;_Bacteroidetes;_Flavobacteria;_Flavobacteriales;_Flavobacteriaceae;_Chryseobacterium      | 0.0 | 0.0 | 0.0 |
| 208 | Bacteria;_Bacteroidetes;_Flavobacteria;_Flavobacteriales;_Flavobacteriaceae;_Elizabethkingia       | 0.0 | 0.0 | 0.0 |
| 209 | Bacteria;_Bacteroidetes;_Sphingobacteriia;_Sphingobacteriales;Other;Other                          | 0.0 | 0.0 | 0.0 |
| 210 | Bacteria;_Bacteroidetes;_Sphingobacteriia;_Sphingobacteriales;_Chitinophagaceae;_Chitinophaga      | 0.0 | 0.1 | 0.0 |
| 211 | Bacteria;_Bacteroidetes;_Sphingobacteriia;_Sphingobacteriales;_Chitinophagaceae;_Flavisolibacter   | 0.0 | 0.0 | 0.0 |
| 212 | Bacteria;_Bacteroidetes;_Sphingobacteriia;_Sphingobacteriales;_Sphingobacteriaceae;Other           | 0.0 | 0.0 | 0.0 |
| 213 | Bacteria;_Chlamydiae;_Chlamydiae;_Chlamydiales;_Chlamydiaceae;Other                                | 0.0 | 0.0 | 0.0 |
| 214 | Bacteria;_Elusimicrobia;_Elusimicrobia;Other;Other;Other                                           | 0.0 | 0.0 | 0.0 |
| 215 | Bacteria;_Firmicutes;_Bacilli;_Bacillales;Other;Other                                              | 0.0 | 0.0 | 0.0 |
| 216 | Bacteria;_Firmicutes;_Bacilli;_Bacillales;_Alicyclobacillaceae;_Tumebacillus                       | 0.0 | 0.1 | 0.0 |
| 217 | Bacteria;_Firmicutes;_Bacilli;_Bacillales;_Bacillaceae;Other                                       | 0.0 | 0.1 | 0.0 |
| 218 | Bacteria;_Firmicutes;_Bacilli;_Bacillales;_Bacillaceae;_Anaerobacillus                             | 0.0 | 0.1 | 0.0 |
| 219 | Bacteria;_Firmicutes;_Bacilli;_Bacillales;_Bacillaceae;_Geobacillus                                | 0.0 | 0.0 | 0.0 |
| 220 | Bacteria;_Firmicutes;_Bacilli;_Bacillales;_Paenibacillaceae;_Brevibacillus                         | 0.0 | 0.0 | 0.0 |
| 221 | Bacteria;_Firmicutes;_Bacilli;_Bacillales;_Planococcaceae;_Planococcus                             | 0.0 | 0.0 | 0.0 |
| 222 | Bacteria;_Firmicutes;_Bacilli;_Lactobacillales;_Aerococcaceae;_Globicatella                        | 0.0 | 0.0 | 0.0 |
| 223 | Bacteria;_Firmicutes;_Bacilli;_Lactobacillales;_Aerococcaceae;_Ignavigranum                        | 0.0 | 0.1 | 0.0 |
| 224 | Bacteria;_Firmicutes;_Bacilli;_Lactobacillales;_Leuconostocaceae;_Leuconostoc                      | 0.0 | 0.0 | 0.0 |
| 225 | Bacteria;_Firmicutes;_Clostridia;Other;Other;Other                                                 | 0.0 | 0.0 | 0.0 |
| 226 | Bacteria;_Firmicutes;_Clostridia;_Clostridiales;_Christensenellaceae;_Christensenella              | 0.0 | 0.0 | 0.0 |
| 227 | Bacteria;_Firmicutes;_Clostridia;_Clostridiales;_Eubacteriaceae;_Anaerofustis                      | 0.0 | 0.0 | 0.0 |
| 228 | Bacteria;_Firmicutes;_Clostridia;_Clostridiales;_Family_XIII_Incertae_Sedis;_g                     | 0.0 | 0.0 | 0.0 |
| 229 | Bacteria;_Firmicutes;_Clostridia;_Clostridiales;_Lachnospiraceae;_Acetitomaculum                   | 0.0 | 0.0 | 0.0 |
| 230 | Bacteria;_Firmicutes;_Clostridia;_Clostridiales;_Lachnospiraceae;_Roseburia                        | 0.0 | 0.0 | 0.0 |
| 231 | Bacteria;_Firmicutes;_Clostridia;_Clostridiales;_Lachnospiraceae;_g                                | 0.0 | 0.0 | 0.0 |
| 232 | Bacteria;_Firmicutes;_Clostridia;_Clostridiales;_Peptococcaceae;Other                              | 0.0 | 0.0 | 0.0 |
| 233 | Bacteria;_Firmicutes;_Clostridia;_Clostridiales;_Ruminococcaceae;_Oscillospira                     | 0.0 | 0.0 | 0.0 |
| 234 | Bacteria;_Firmicutes;_Clostridia;_Clostridiales;_Veillonellaceae;_Succiniclaticum                  | 0.0 | 0.0 | 0.0 |
| 235 | Bacteria;_Firmicutes;_Clostridia;_Clostridiales;_uncultured;_g                                     | 0.0 | 0.0 | 0.0 |
| 236 | Bacteria;_Firmicutes;_Erysipelotrichi;_Erysipelotrichales;_Erysipelotrichaceae;_Solobacterium      | 0.0 | 0.0 | 0.0 |
| 237 | Bacteria;_Lentisphaerae;_Lentisphaeria;_RFP12_gut_group;_f;_g                                      | 0.0 | 0.0 | 0.0 |
| 238 | Bacteria;_Proteobacteria;_Alphaproteobacteria;_Rhizobiales;_Methylobacteriaceae;_Methylobacterium  | 0.0 | 0.1 | 0.0 |
| 239 | Bacteria;_Proteobacteria;_Alphaproteobacteria;_Rhizobiales;_Rhizobiaceae;Other                     | 0.0 | 0.0 | 0.0 |
| 240 | Bacteria;_Proteobacteria;_Alphaproteobacteria;_Rhodobacterales;_Rhodobacteraceae;Other             | 0.0 | 0.0 | 0.0 |
| 241 | Bacteria;_Proteobacteria;_Alphaproteobacteria;_Rhodobacterales;_Rhodobacteraceae;_Paracoccus       | 0.0 | 0.0 | 0.0 |
| 242 | Bacteria;_Proteobacteria;_Alphaproteobacteria;_Sphingomonadales;Other;Other                        | 0.0 | 0.0 | 0.0 |
| 243 | Bacteria;_Proteobacteria;_Alphaproteobacteria;_Sphingomonadales;_Sphingomonadaceae;_Sphingobium    | 0.0 | 0.0 | 0.0 |
| 244 | Bacteria;_Proteobacteria;_Betaproteobacteria;_Burkholderiales;_Alcaligenaceae;_Alcaligenes         | 0.0 | 0.0 | 0.0 |
| 245 | Bacteria;_Proteobacteria;_Betaproteobacteria;_Burkholderiales;_Comamonadaceae;_Pelomonas           | 0.0 | 0.1 | 0.0 |
| 246 | Bacteria;_Proteobacteria;_Betaproteobacteria;_Burkholderiales;_Oxalobacteraceae;Other              | 0.0 | 0.0 | 0.0 |
| 247 | Bacteria;_Proteobacteria;_Betaproteobacteria;_Neisseriales;_Neisseriaceae;_Microvirgula            | 0.0 | 0.0 | 0.0 |
| 248 | Bacteria;_Proteobacteria;_Deltaproteobacteria;_Myxococcales;Other;Other                            | 0.0 | 0.0 | 0.0 |
| 249 | Bacteria;_Proteobacteria;_Deltaproteobacteria;_Myxococcales;_0319-6G20;_g                          | 0.0 | 0.0 | 0.0 |
| 250 | Bacteria;_Proteobacteria;_Epsilonproteobacteria;_Campylobacterales;_Campylobacteraceae;_Arcobacter | 0.0 | 0.0 | 0.0 |
| 251 | Bacteria;_Proteobacteria;_Gammaproteobacteria;_Aeromonadales;Other;Other                           | 0.0 | 0.0 | 0.0 |
| 252 | Bacteria;_Proteobacteria;_Gammaproteobacteria;_Aeromonadales;_Aeromonadaceae;_Zobellella           | 0.0 | 0.0 | 0.0 |
| 253 | Bacteria;_Proteobacteria;_Gammaproteobacteria;_Alteromonadales;Other;Other                         | 0.0 | 0.0 | 0.0 |
| 254 | Bacteria;_Proteobacteria;_Gammaproteobacteria;_Alteromonadales;_Shewanellaceae;_Shewanella         | 0.0 | 0.0 | 0.0 |
| 255 | Bacteria;_Proteobacteria;_Gammaproteobacteria;_Chromatiales;_Chromatiaceae;_Rheinheimera           | 0.0 | 0.0 | 0.0 |
| 256 | Bacteria;_Proteobacteria;_Gammaproteobacteria;_Pasteurellales;_Pasteurellaceae;_Haemophilus        | 0.0 | 0.0 | 0.0 |
| 257 | Bacteria;_Proteobacteria;_Gammaproteobacteria;_Pseudomonadales;_Moraxellaceae;_Moraxella           | 0.0 | 0.0 | 0.0 |
| 258 | Bacteria;_Spirochaetes;_Spirochaetes;_Spirochaetales;_Spirochaetaceae;_Spirochaeta                 | 0.0 | 0.0 | 0.0 |
| 259 | Bacteria;_Spirochaetes;_Spirochaetes;_Spirochaetales;_Spirochaetaceae;_Treponema                   | 0.0 | 0.0 | 0.0 |
| 260 | Bacteria;_Tenericutes;_Mollicutes;_RF9;_f;_g                                                       | 0.0 | 0.0 | 0.0 |
| 261 | Unclassified;Other;Other;Other;Other;Other                                                         | 0.0 | 0.0 | 0.0 |

Average value of the six-times collections.

## Figure legends

**Figure S1** Prefectures in Japan from which the faecal samples from neonatal calves were collected. Black points indicate the approximate locations of the farm(s). The map was obtained from CraftMAP (<http://www.craftmap.box-i.net/>) and edited by Microsoft® PowerPoint® 2013.

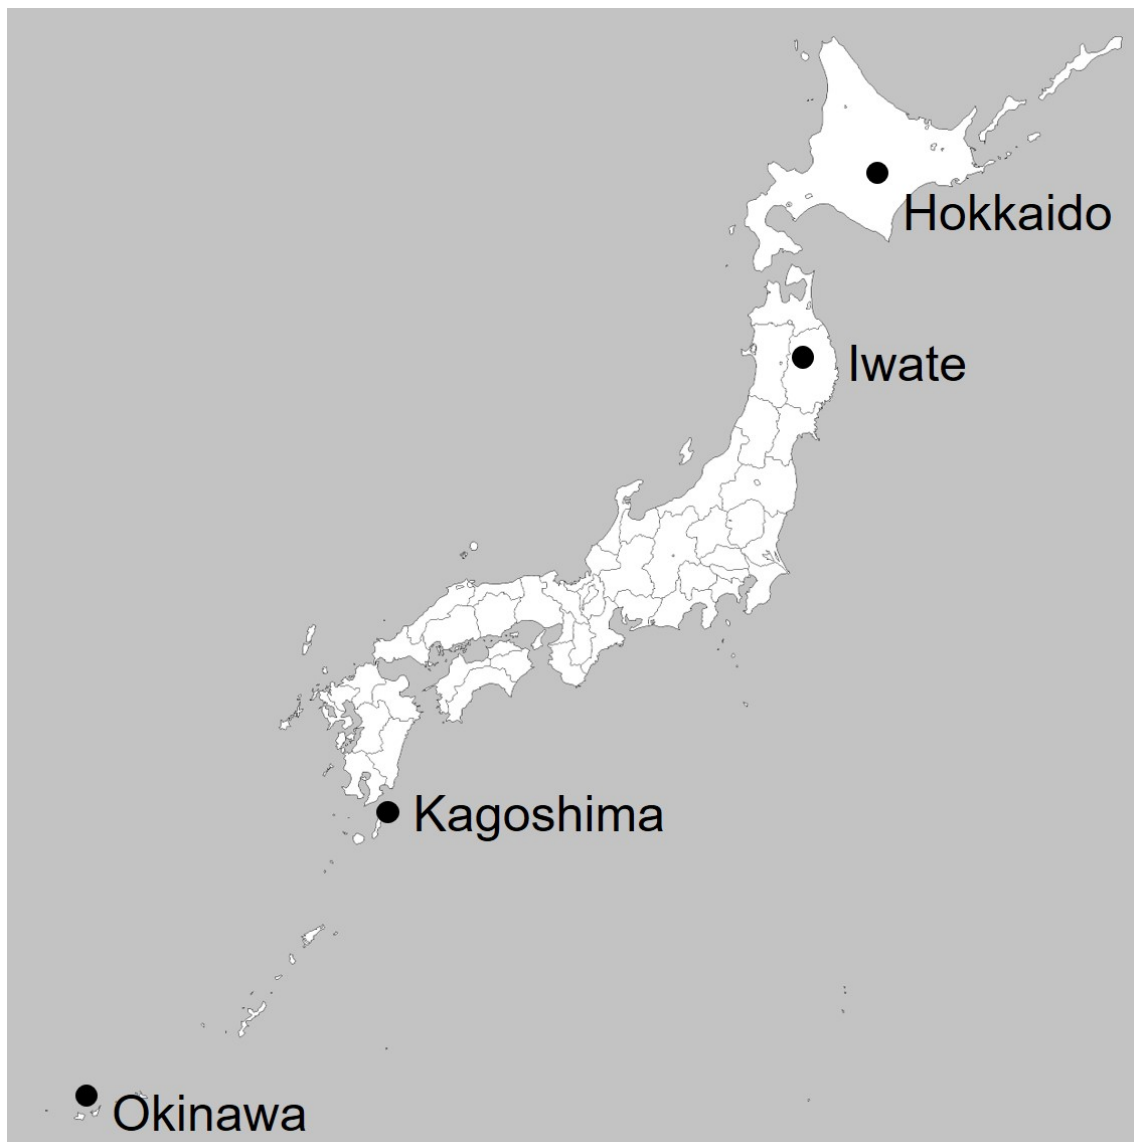

Supplement: 41598_2019_48969_MOESM1_ESM.pdf [file 41598_2019_48969_MOESM1_ESM.pdf]
